# Supplementary material for: Canadian newspaper coverage on harm reduction featuring bereaved mothers: A mixed methods analysis
Source: PubMed Central journal article supplement (PMC10681218; doi:10.1371/journal.pone.0294608), 2023-11-27
Supplement: pone.0294608.s001.pdf [file pone.0294608.s001.pdf]

**S1 Table. Newspapers with Highest Circulation in Each Province/Territory, Canadian Harm Reduction Policy Project (CHARPP)**

|                  |                                                                                                                               |
|------------------|-------------------------------------------------------------------------------------------------------------------------------|
| British Columbia | The Vancouver Sun, The Province [Vancouver], Times Colonist [Victoria], Courier [Kelowna], The Kamloops Daily News            |
| Alberta          | Calgary Herald, The Calgary Sun, The Edmonton Journal, The Edmonton Sun, Lethbridge Herald, Red Deer Advocate                 |
| Saskatchewan     | The Star Phoenix [Saskatoon], The Leader-Post [Regina], The Times-Herald [Moose Jaw], Prince Albert Daily Herald              |
| Manitoba         | Winnipeg Free Press, Winnipeg Sun, The Daily Graphic [Portage La Prairie]                                                     |
| Ontario          | Toronto Star, The Toronto Sun, Ottawa Citizen, The Spectator [Hamilton], The London Free Press                                |
| Quebec           | Le Journal de Montréal, La Presse [Montreal], Le Journal de Québec, The Gazette [Montreal], Le Soleil [Quebec City]           |
| New Brunswick    | Times Transcript [Moncton], New Brunswick Telegraph Journal [Saint John], The Daily Gleaner [Fredericton]                     |
| Nova Scotia      | The Chronicle Herald [Halifax], Cape Breton Post [Sydney], The News [New Glasgow], The Daily News [Truro], Amherst Daily News |

|                           |                                                                     |
|---------------------------|---------------------------------------------------------------------|
| Prince Edward Island      | The Guardian [Charlottetown], The Journal Pioneer [Summerside]      |
| Newfoundland and Labrador | The Telegram [St. John's], The Western Star [Corner Brook]          |
| Nunavut                   | Nunavut News/North, Nunatsiaq News [online], CBC North [online]     |
| Northwest Territories     | NWT News/North, CBC North [online], Yellowknifer [online], Northern |
| Yukon                     | The Whitehorse Star                                                 |
